# Supplementary material for: Autoimmunity conferred by chs3-2D relies on CSA1, its adjacent TNL-encoding neighbour
Source: PubMed Central journal article supplement (PMC4350097; doi:10.1038/srep08792), 2015-03-05
Supplement: srep08792-s1.pdf [file srep08792-s1.pdf]

**Supplementary information:**

**Autoimmunity conferred by *chs3-2D* relies on *CSA1*, its adjacent TIR-NB-LRR-encoding neighbour**

**Fang Xu, Chipan Zhu, Volkan Cevik, Kaeli Johnson, Yanan Liu, Kee Sohn, Jonathan D. Jones, Eric B. Holub and Xin Li**

**Supplementary Figure 1. *PR1* and *PR2* expression in plants of the indicated genotypes as determined by RT-PCR.**

*PR1* and *ACTIN7* were amplified with 28 cycles, and *PR2* was amplified with 30 cycles of PCR. The last 3 lanes plus the WT control panel were cropped and merged into Figure 3C. The gels were run under the same conditions and were processed in parallel.
